# Supplementary material
Source: PubMed Central journal article supplement (PMC7086297)
Supplement: Supplementary_Data.pdf [file Supplementary_Data.pdf]

Table SI. IC<sub>50</sub> ( $\mu$ M) values of TPFS compounds.

| Compounds | Cell lines | Reporter assay | Real time RT-PCR | Flow cytometry |
|-----------|------------|----------------|------------------|----------------|
| TPFS-201  | PC-3       | -              | 0.87             | -              |
|           | A549       | 0.61           | -                | -              |
|           | THP-1      | -              | -                | 0.93           |
|           | B16F10     | -              | 6.4              | -              |
|           | RAW264.7   | -              | 6.6              | -              |
| TPFS-202  | A549       | 0.62           | -                | -              |
|           | THP-1      | -              | -                | 0.67           |
|           | B16F10     | -              | 6.1              | 6.2            |
|           | RAW264.7   | -              | 6.2              | -              |

RT, reverse transcription.
